# Supplementary material for: Bimetallic Ni–Cu alloy nanoparticles supported on silica for the water-gas shift reaction: activating surface hydroxyls via enhanced CO adsorption
Source: Royal Society of Chemistry journal article supplement (doi:10.1039/c5cy01885d), 2015-12-08
Supplement: c5cy01885d1.pdf [file c5cy01885d1.pdf]

# Bimetallic Ni-Cu Alloy Nanoparticles Supported on Silica for Water-Gas Shift Reaction: Activating Surface Hydroxyls via Enhanced CO Adsorption

M.L. Ang<sup>a</sup>, J.T. Miller<sup>b</sup>, Y. Cui<sup>b</sup>, L. Mo<sup>c</sup>, S. Kawi<sup>a\*</sup>

<sup>a</sup>Department of Chemical and Biomolecular Engineering, National University of Singapore, 4  
Engineering Drive 4, Singapore 117576

<sup>b</sup>School of Chemical Engineering, Purdue University, West Lafayette, IN 47907, USA

<sup>c</sup>Institute of Catalysis, Department of Chemistry, Zhejiang University, Tianmushan Road 148,  
Hangzhou 310028, PR China

\*Corresponding author: Phone: +65-6516 6312; Fax: +65-6779 1936; E-Mail address:

[chekawis@nus.edu.sg](mailto:chekawis@nus.edu.sg)

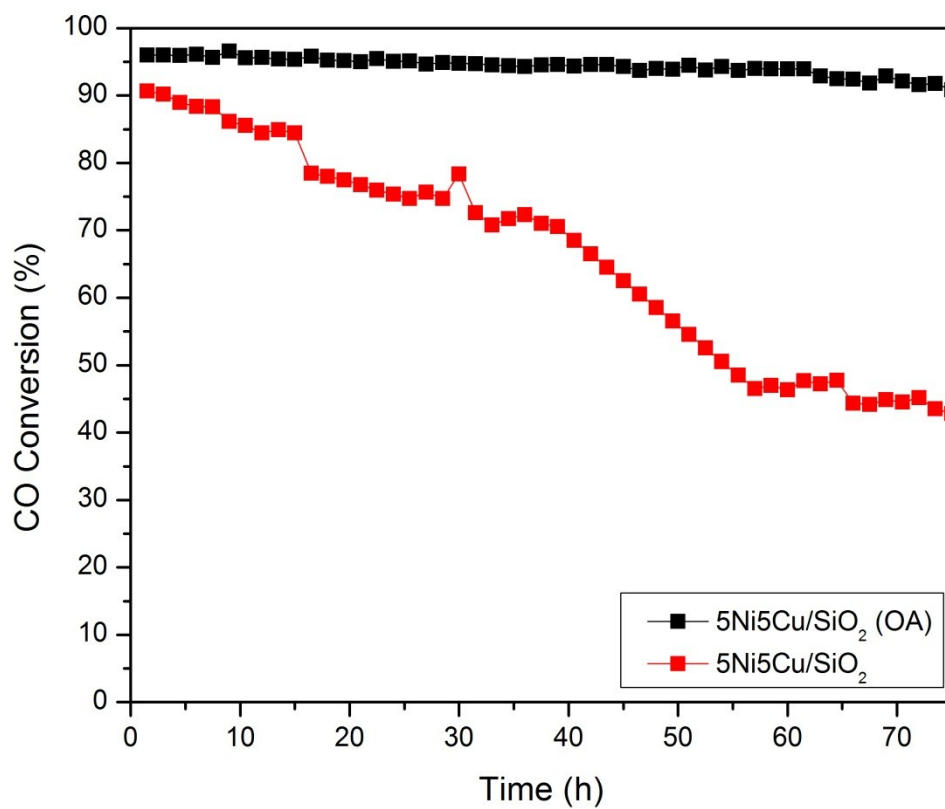

Figure S1 Percentages of CO conversion to CO<sub>2</sub> of 5Ni5Cu/SiO<sub>2</sub> and 5Ni5Cu/SiO<sub>2</sub> (OA) catalysts for 75 h reaction.

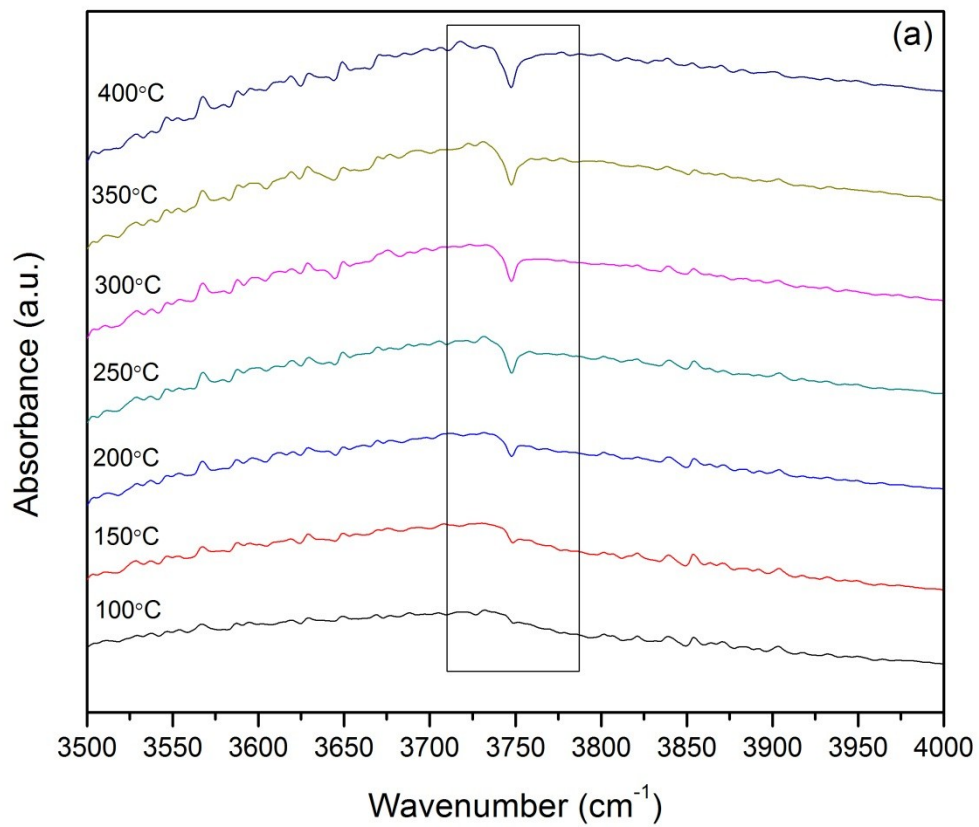

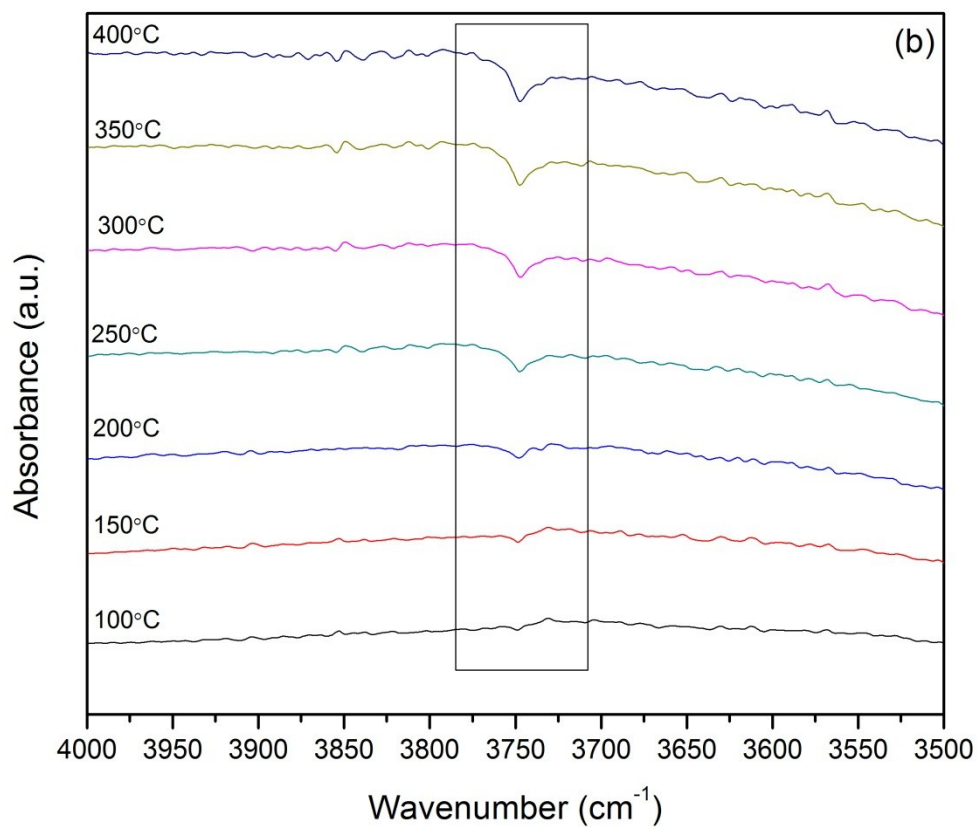

Figure S2 FTIR spectra in the hydroxyl region (3500 – 4000 cm<sup>-1</sup>) for (a) 10Ni/SiO<sub>2</sub> (OA) and (b) 5Ni5Cu/SiO<sub>2</sub> (OA) catalysts.
